# Supplementary material for: Comparative analysis between 2D and 3D colorectal cancer culture models for insights into cellular morphological and transcriptomic variations
Source: PubMed Central journal article supplement (PMC10603139; doi:10.1038/s41598-023-45144-w), 2023-10-26
Supplement: 41598_2023_45144_MOESM1_ESM.pdf [file 41598_2023_45144_MOESM1_ESM.pdf]

Supp. 1: Mean ( $\pm$ SD) percentage of cell viability of Caco-2, HCT-116, SW-480, LS147T, and HCT-8 cell lines growing in 2D and 3D cell culture systems at 37°C, 5% CO<sub>2</sub> for seven days,  $n = 6$ .

| Time (Day) | Caco-2 Viability % (Mean $\pm$ SD) |                   |                | HCT-116 Viability % (Mean $\pm$ SD) |                  |                |
|------------|------------------------------------|-------------------|----------------|-------------------------------------|------------------|----------------|
|            | 2D                                 | 3D                | <i>p</i> value | 2D                                  | 3D               | <i>p</i> value |
| 1          | 100                                | 100               | -----          | 100                                 | 100              | -----          |
| 2          | 120.8 $\pm$ 5.5                    | 153.7 $\pm$ 8.1   | <0.0001**      | 141.3 $\pm$ 6.8                     | 137.8 $\pm$ 6.1  | 0.7718NS       |
| 3          | 81.3 $\pm$ 3.7                     | 174.9 $\pm$ 9.2   | <0.0001**      | 95.1 $\pm$ 4.5                      | 156.7 $\pm$ 7.0  | <0.0001**      |
| 4          | 50.2 $\pm$ 2.3                     | 190.6 $\pm$ 10.01 | <0.0001**      | 58.8 $\pm$ 2.8                      | 155.1 $\pm$ 6.8  | <0.0001**      |
| 5          | 22.8 $\pm$ 1.04                    | 185.7 $\pm$ 9.9   | <0.0001**      | 26.7 $\pm$ 1.3                      | 140.2 $\pm$ 6.2  | <0.0001**      |
| 6          | 7.8 $\pm$ 0.32                     | 152.9 $\pm$ 8.02  | <0.0001**      | 8.5 $\pm$ 0.4                       | 115.5 $\pm$ 5.1  | <0.0001**      |
| 7          | 1.3 $\pm$ 0.06                     | 136.5 $\pm$ 1.2   | <0.0001**      | 1.5 $\pm$ 0.1                       | 103.1 $\pm$ 4.6  | <0.0001**      |
| Time (Day) | SW480 Viability % (Mean $\pm$ SD)  |                   |                | LS174T Viability % (Mean $\pm$ SD)  |                  |                |
|            | 2D                                 | 3D                | <i>p</i> value | 2D                                  | 3D               | <i>p</i> value |
| 1          | 100                                | 100               | -----          | 100                                 | 100              | -----          |
| 2          | 90.6 $\pm$ 8.2                     | 106.2 $\pm$ 5.3   | <0.0001**      | 123.6 $\pm$ 10.3                    | 110.4 $\pm$ 2.7  | <0.0001**      |
| 3          | 60.9 $\pm$ 5.5                     | 110.2 $\pm$ 5.5   | <0.0001**      | 83.2 $\pm$ 6.9                      | 131.03 $\pm$ 3.2 | <0.0001**      |
| 4          | 37.7 $\pm$ 3.4                     | 125.4 $\pm$ 6.2   | <0.0001**      | 51.4 $\pm$ 4.3                      | 123.8 $\pm$ 3.0  | <0.0001**      |
| 5          | 17.1 $\pm$ 1.6                     | 108.3 $\pm$ 5.4   | <0.0001**      | 23.4 $\pm$ 1.9                      | 114.4 $\pm$ 2.8  | <0.0001**      |
| 6          | 5.5 $\pm$ 0.5                      | 84.9 $\pm$ 4.2    | <0.0001**      | 7.4 $\pm$ 0.6                       | 102.3 $\pm$ 2.5  | <0.0001**      |
| 7          | 0.98 $\pm$ 0.1                     | 67.3 $\pm$ 3.3    | <0.0001**      | 1.4 $\pm$ 0.1                       | 88.8 $\pm$ 2.2   | <0.0001**      |
| Time (Day) | HCT-8 Viability % (Mean $\pm$ SD)  |                   |                |                                     |                  |                |
|            | 2D                                 | 3D                | <i>p</i> value |                                     |                  |                |
| 1          | 100                                | 100               | -----          |                                     |                  |                |
| 2          | 111.5 $\pm$ 7.9                    | 138.5 $\pm$ 31.7  | 0.0574         |                                     |                  |                |
| 3          | 77.9 $\pm$ 7.7                     | 143.9 $\pm$ 30.2  | <0.0001**      |                                     |                  |                |
| 4          | 67.6 $\pm$ 9.8                     | 132.5 $\pm$ 19.2  | <0.0001**      |                                     |                  |                |
| 5          | 47.7 $\pm$ 6.8                     | 131.6 $\pm$ 18.9  | <0.0001**      |                                     |                  |                |
| 6          | 32.2 $\pm$ 5.8                     | 111.0 $\pm$ 15.9  | <0.0001**      |                                     |                  |                |
| 7          | 17.8 $\pm$ 3.9                     | 102.8 $\pm$ 30.7  | <0.0001**      |                                     |                  |                |

\*\*: $p \leq 0.01$ , NS: Non-Significant, SD: Standard Deviation, 2D: Two-Dimensional, 3D: Three-Dimensional.
