# Supplementary material for: Comparative analysis between 2D and 3D colorectal cancer culture models for insights into cellular morphological and transcriptomic variations
Source: PubMed Central journal article supplement (PMC10603139; doi:10.1038/s41598-023-45144-w), 2023-10-26
Supplement: 41598_2023_45144_MOESM3_ESM.pdf [file 41598_2023_45144_MOESM3_ESM.pdf]

Supp. 3: Mean ( $\pm$ SD) inhibition percentage and half maximal inhibition ( $IC_{50}$ ) values for 5- fluorouracil, cisplatin and doxorubicin treated colorectal cancer cells in 2D and 3D culture models ( $n = 6$ ).

**Caco-2**

| Drug        | Conc. $\mu\text{g mL}^{-1}$ | 2D               |                |     | $IC_{50}$ 2D | 3D               |                |     | $IC_{50}$ 3D | Sig. |
|-------------|-----------------------------|------------------|----------------|-----|--------------|------------------|----------------|-----|--------------|------|
|             |                             | Mean ( $\pm$ SD) | Inhibition (%) |     |              | Mean ( $\pm$ SD) | Inhibition (%) |     |              |      |
| 5FU         | 500                         | 63.5             | $\pm$          | 2.3 | 18.2         | 53.5             | $\pm$          | 1.3 | 100.6        | **   |
|             | 250                         | 61.5             | $\pm$          | 1.4 |              | 49.5             | $\pm$          | 1.3 |              | **   |
|             | 125                         | 59.7             | $\pm$          | 2.4 |              | 41.5             | $\pm$          | 1.6 |              | **   |
|             | 62.5                        | 55.5             | $\pm$          | 1.9 |              | 6.6              | $\pm$          | 1.2 |              | **   |
|             | 33.3                        | 39.9             | $\pm$          | 1.7 |              | 4.5              | $\pm$          | 1.8 |              | **   |
|             | 16.6                        | 10.0             | $\pm$          | 1.3 |              | 3.9              | $\pm$          | 1.2 |              | **   |
| Cisplatin   | 1000                        | 89.8             | $\pm$          | 2.2 | 107.0        | 81.8             | $\pm$          | 1.9 | 315.9        | **   |
|             | 500                         | 90.3             | $\pm$          | 2.4 |              | 74.7             | $\pm$          | 2.5 |              | **   |
|             | 250                         | 82.2             | $\pm$          | 2.5 |              | 36.8             | $\pm$          | 1.7 |              | **   |
|             | 125                         | 52.1             | $\pm$          | 2.7 |              | 24.2             | $\pm$          | 1.7 |              | **   |
|             | 62.5                        | 31.6             | $\pm$          | 2.1 |              | 24.8             | $\pm$          | 1.8 |              | **   |
|             | 33.3                        | 22.8             | $\pm$          | 1.9 |              | 25.4             | $\pm$          | 1.2 |              | NS   |
|             | 16.6                        | 5.0              | $\pm$          | 1.5 |              | 4.7              | $\pm$          | 1.1 |              | NS   |
| Doxorubicin | 250                         | 77.2             | $\pm$          | 1.3 | 27.1         | 57.3             | $\pm$          | 1.5 | 47.6         | **   |
|             | 125                         | 76.4             | $\pm$          | 1.5 |              | 54.1             | $\pm$          | 1.2 |              | **   |
|             | 62.5                        | 73.7             | $\pm$          | 1.6 |              | 43.7             | $\pm$          | 1.9 |              | **   |
|             | 31.3                        | 57.6             | $\pm$          | 1.5 |              | 11.3             | $\pm$          | 1.2 |              | **   |
|             | 15.6                        | 8.7              | $\pm$          | 1.5 |              | 4.5              | $\pm$          | 1.7 |              | *    |
|             | 7.8                         | 7.6              | $\pm$          | 1.6 |              | 3.3              | $\pm$          | 1.4 |              | *    |

**HCT-116**

| Drug      | Conc. $\mu\text{g mL}^{-1}$ | 2D               |                |     | $IC_{50}$ 2D | 3D               |                |     | $IC_{50}$ 3D | Sig. |
|-----------|-----------------------------|------------------|----------------|-----|--------------|------------------|----------------|-----|--------------|------|
|           |                             | Mean ( $\pm$ SD) | Inhibition (%) |     |              | Mean ( $\pm$ SD) | Inhibition (%) |     |              |      |
| 5FU       | 500                         | 90.3             | $\pm$          | 2.2 | 69.7         | 79.0             | $\pm$          | 2.2 | 207.9        | **   |
|           | 250                         | 89.8             | $\pm$          | 2.2 |              | 60.4             | $\pm$          | 0.9 |              | **   |
|           | 125                         | 79.2             | $\pm$          | 2.5 |              | 26.6             | $\pm$          | 1.4 |              | **   |
|           | 62.5                        | 51.1             | $\pm$          | 1.9 |              | 19.7             | $\pm$          | 2.3 |              | **   |
|           | 33.3                        | 30.6             | $\pm$          | 1.9 |              | 18.9             | $\pm$          | 1.8 |              | **   |
|           | 16.6                        | 22.8             | $\pm$          | 3.2 |              | 18.4             | $\pm$          | 1.8 |              | NS   |
| Cisplatin | 1000                        | 82.7             | $\pm$          | 1.7 | 115.4        | 74.7             | $\pm$          | 1.9 | 319.5        | **   |
|           | 500                         | 83.2             | $\pm$          | 1.5 |              | 67.6             | $\pm$          | 2.4 |              | **   |
|           | 250                         | 75.0             | $\pm$          | 2.3 |              | 29.6             | $\pm$          | 1.9 |              | **   |

|                    |      |      |   |     |             |      |   |     |             |    |
|--------------------|------|------|---|-----|-------------|------|---|-----|-------------|----|
|                    | 125  | 44.0 | ± | 1.8 |             | 17.1 | ± | 1.7 |             | ** |
|                    | 62.5 | 23.5 | ± | 1.3 |             | 17.7 | ± | 1.5 |             | ** |
|                    | 33.3 | 15.7 | ± | 1.4 |             | 18.3 | ± | 1.9 |             | NS |
|                    | 16.6 | 1.0  | ± | 1.9 |             | 2.9  | ± | 1.8 |             | NS |
| <b>Doxorubicin</b> | 250  | 96.0 | ± | 2.1 | <b>34.5</b> | 88.0 | ± | 1.8 | <b>82.9</b> | ** |
|                    | 125  | 96.5 | ± | 1.9 |             | 80.9 | ± | 1.3 |             | ** |
|                    | 62.5 | 88.4 | ± | 1.7 |             | 43.0 | ± | 1.9 |             | ** |
|                    | 31.3 | 57.3 | ± | 1.4 |             | 30.4 | ± | 2.7 |             | ** |
|                    | 15.6 | 36.8 | ± | 1.9 |             | 31.0 | ± | 1.9 |             | ** |
|                    | 7.8  | 29.0 | ± | 2.4 |             | 31.6 | ± | 1.8 |             | NS |

### SW-480

| Drug               | Conc.<br>$\mu\text{g mL}^{-1}$ | 2D<br>Mean ( $\pm$ SD)<br>Inhibition<br>(%) |       | IC <sub>50</sub><br>2D | 3D<br>Mean ( $\pm$ SD)<br>Inhibition<br>(%) |       | IC <sub>50</sub><br>3D | Sig. |
|--------------------|--------------------------------|---------------------------------------------|-------|------------------------|---------------------------------------------|-------|------------------------|------|
| <b>5FU</b>         | 500.0                          | 80.2                                        | ± 1.7 | <b>51.7</b>            | 56.1                                        | ± 1.9 | <b>88.7</b>            | **   |
|                    | 250.0                          | 79.3                                        | ± 2.1 |                        | 50.0                                        | ± 2.1 |                        | **   |
|                    | 125.0                          | 71.5                                        | ± 1.9 |                        | 40.2                                        | ± 2.0 |                        | **   |
|                    | 62.5                           | 53.6                                        | ± 2.2 |                        | 28.8                                        | ± 1.7 |                        | **   |
|                    | 33.3                           | 36.1                                        | ± 0.9 |                        | 17.7                                        | ± 1.6 |                        | **   |
|                    | 16.6                           | 21.8                                        | ± 1.3 |                        | 13.0                                        | ± 1.5 |                        | **   |
| <b>Cisplatin</b>   | 1000.0                         | 56.3                                        | ± 2.2 | <b>53.8</b>            | 50.0                                        | ± 1.4 | <b>199.3</b>           | **   |
|                    | 500.0                          | 56.3                                        | ± 1.8 |                        | 45.0                                        | ± 1.7 |                        | **   |
|                    | 250.0                          | 56.3                                        | ± 1.7 |                        | 38.0                                        | ± 2.0 |                        | **   |
|                    | 125.0                          | 51.0                                        | ± 1.9 |                        | 10.0                                        | ± 2.3 |                        | **   |
|                    | 62.5                           | 36.4                                        | ± 2.1 |                        | 6.5                                         | ± 1.9 |                        | **   |
|                    | 33.3                           | 6.5                                         | ± 1.9 |                        | 6.5                                         | ± 1.6 |                        | NS   |
|                    | 16.6                           | 0.7                                         | ± 1.7 |                        | 6.4                                         | ± 1.5 |                        | *    |
| <b>Doxorubicin</b> | 500.0                          | 79.6                                        | ± 1.4 | <b>55.3</b>            | 59.8                                        | ± 2.6 | <b>95.8</b>            | **   |
|                    | 250.0                          | 79.8                                        | ± 1.9 |                        | 56.6                                        | ± 1.6 |                        | **   |
|                    | 125.0                          | 77.1                                        | ± 2.4 |                        | 46.1                                        | ± 1.9 |                        | **   |
|                    | 62.5                           | 60.0                                        | ± 2.0 |                        | 13.7                                        | ± 2.1 |                        | **   |
|                    | 33.3                           | 11.1                                        | ± 1.0 |                        | 6.9                                         | ± 2.3 |                        | *    |
|                    | 16.6                           | 10.0                                        | ± 1.9 |                        | 5.7                                         | ± 1.8 |                        | *    |

LS174T

| Drug        | Conc.<br>µg mL <sup>-1</sup> | 2D         |                |     | IC <sub>50</sub><br>2D | 3D         |                |     | IC <sub>50</sub><br>3D | Sig. |
|-------------|------------------------------|------------|----------------|-----|------------------------|------------|----------------|-----|------------------------|------|
|             |                              | Mean (±SD) | Inhibition (%) |     |                        | Mean (±SD) | Inhibition (%) |     |                        |      |
| 5FU         | 500                          | 76.0       | ±              | 1.4 | 69.7                   | 58.3       | ±              | 1.4 | 207.9                  | **   |
|             | 250                          | 75.1       | ±              | 1.7 |                        | 56.5       | ±              | 1.6 |                        | **   |
|             | 125                          | 67.2       | ±              | 2.1 |                        | 51.3       | ±              | 1.9 |                        | **   |
|             | 62.5                         | 49.4       | ±              | 1.6 |                        | 32.4       | ±              | 2.4 |                        | **   |
|             | 33.3                         | 31.8       | ±              | 1.5 |                        | 12.2       | ±              | 1.2 |                        | **   |
|             | 16.6                         | 17.6       | ±              | 1.3 |                        | 9.8        | ±              | 1.6 |                        | **   |
| Cisplatin   | 1000                         | 60.0       | ±              | 1.7 | 115.4                  | 50.0       | ±              | 2.5 | 319.5                  | **   |
|             | 500                          | 58.0       | ±              | 1.4 |                        | 46.0       | ±              | 2.6 |                        | **   |
|             | 250                          | 56.3       | ±              | 1.9 |                        | 38.0       | ±              | 1.5 |                        | **   |
|             | 125                          | 52.0       | ±              | 1.2 |                        | 3.1        | ±              | 1.7 |                        | **   |
|             | 62.5                         | 36.4       | ±              | 2.1 |                        | 1.0        | ±              | 2.1 |                        | **   |
|             | 33.3                         | 6.5        | ±              | 2.2 |                        | 0.5        | ±              | 1.3 |                        | **   |
|             | 16.6                         | 0.7        | ±              | 1.4 |                        | 0.0        | ±              | 1.6 |                        | NS   |
| Doxorubicin | 250                          | 85.1       | ±              | 1.5 | 34.5                   | 77.1       | ±              | 1.5 | 82.9                   | **   |
|             | 125                          | 85.6       | ±              | 1.9 |                        | 70.0       | ±              | 1.3 |                        | **   |
|             | 62.5                         | 77.5       | ±              | 1.5 |                        | 32.1       | ±              | 1.6 |                        | **   |
|             | 31.3                         | 46.5       | ±              | 1.3 |                        | 19.5       | ±              | 1.4 |                        | **   |
|             | 15.6                         | 25.9       | ±              | 2.2 |                        | 20.1       | ±              | 1.8 |                        | **   |
|             | 7.8                          | 18.1       | ±              | 1.6 |                        | 20.7       | ±              | 1.2 |                        | NS   |

HCT-8

| Drug      | Conc.<br>µg mL <sup>-1</sup> | 2D         |                |     | IC <sub>50</sub><br>2D | 3D         |                |     | IC <sub>50</sub><br>3D | Sig. |
|-----------|------------------------------|------------|----------------|-----|------------------------|------------|----------------|-----|------------------------|------|
|           |                              | Mean (±SD) | Inhibition (%) |     |                        | Mean (±SD) | Inhibition (%) |     |                        |      |
| 5FU       | 500                          | 66.3       | ±              | 2.3 | 88.59                  | 61.1       | ±              | 1.3 | 59.31                  | **   |
|           | 250                          | 61.7       | ±              | 1.4 |                        | 59.2       | ±              | 1.3 |                        | NS   |
|           | 125                          | 46.9       | ±              | 2.4 |                        | 54.0       | ±              | 1.6 |                        | **   |
|           | 62.5                         | 22.9       | ±              | 1.9 |                        | 38.2       | ±              | 1.2 |                        | **   |
|           | 33.3                         | 10.3       | ±              | 1.7 |                        | 18.0       | ±              | 1.8 |                        | **   |
|           | 16.6                         | 3.57       | ±              | 1.3 |                        | 12.5       | ±              | 1.2 |                        | **   |
| Cisplatin | 1000                         | 62.5       | ±              | 2.2 | 54.44                  | 59.2       | ±              | 1.9 | 172.70                 | NS   |
|           | 500                          | 60.5       | ±              | 2.4 |                        | 55.2       | ±              | 2.5 |                        | *    |
|           | 250                          | 58.7       | ±              | 2.5 |                        | 47.2       | ±              | 1.7 |                        | **   |
|           | 125                          | 54.5       | ±              | 2.7 |                        | 22.4       | ±              | 1.7 |                        | **   |
|           | 62.5                         | 38.9       | ±              | 2.1 |                        | 13.2       | ±              | 1.8 |                        | **   |
|           | 33.3                         | 8.98       | ±              | 1.9 |                        | 9.7        | ±              | 1.2 |                        | NS   |

|                    |      |      |   |     |              |      |   |     |               |    |
|--------------------|------|------|---|-----|--------------|------|---|-----|---------------|----|
|                    | 16.6 | 3.12 | ± | 1.5 |              | 9.2  | ± | 1.1 |               | ** |
| <b>Doxorubicin</b> | 250  | 83.4 | ± | 1.3 | <b>34.53</b> | 79.9 | ± | 1.5 | <b>107.40</b> | *  |
|                    | 125  | 83.9 | ± | 1.5 |              | 59.4 | ± | 1.2 |               | ** |
|                    | 62.5 | 75.8 | ± | 1.6 |              | 25.5 | ± | 1.9 |               | ** |
|                    | 31.3 | 44.8 | ± | 1.5 |              | 18.2 | ± | 1.2 |               | ** |
|                    | 15.6 | 24.2 | ± | 1.5 |              | 18.6 | ± | 1.7 |               | ** |
|                    | 7.8  | 16.4 | ± | 1.6 |              | 18.9 | ± | 1.4 |               | NS |
